# Supplementary material for: Symptoms of Infarction in Women: Is There a Real Difference Compared to Men? A Systematic Review of the Literature with Meta-Analysis
Source: MDPI journal article supplement (doi:10.3390/jcm11051319), 2022-02-27
Supplement: s1 [file s1]

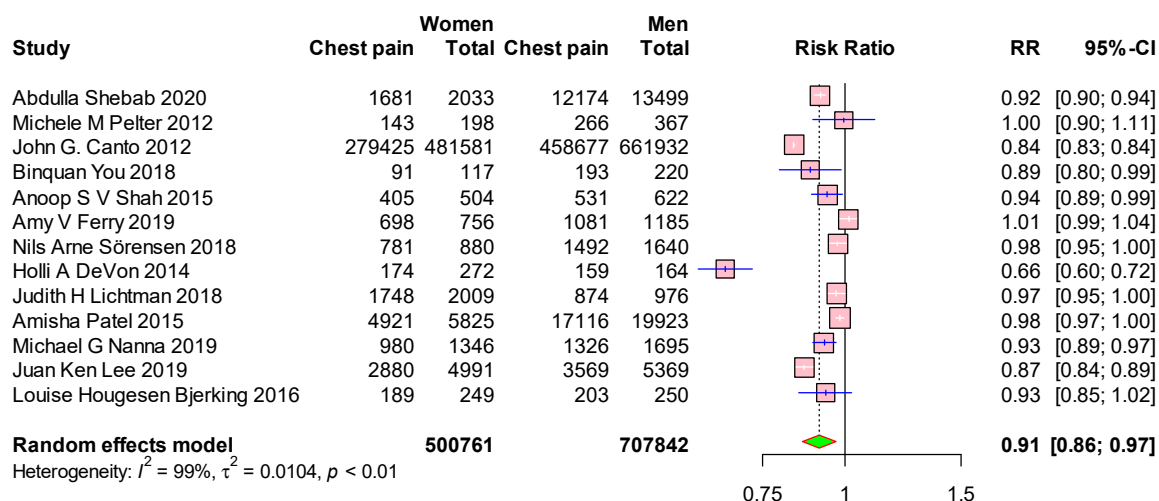

Figure S1 : chest pain

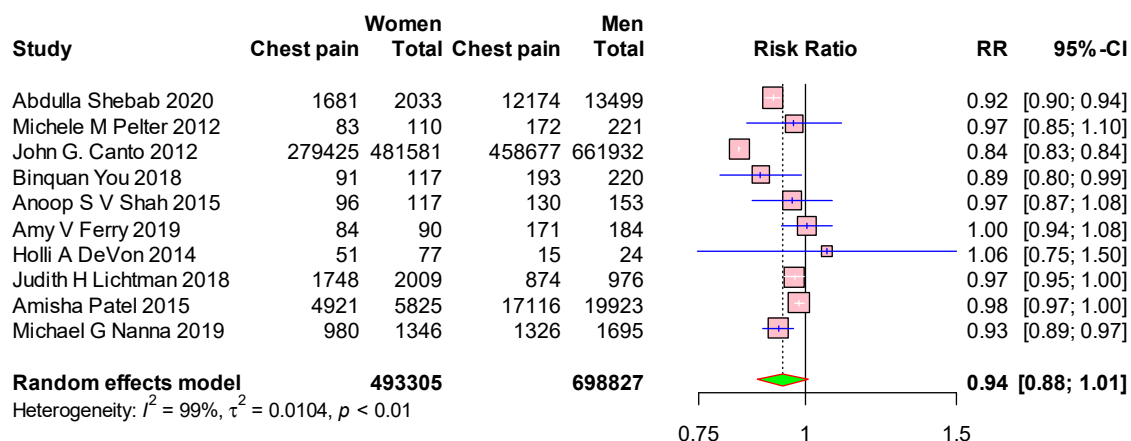

Figure S2 : Chest pain in the ACS confirmed subgroup

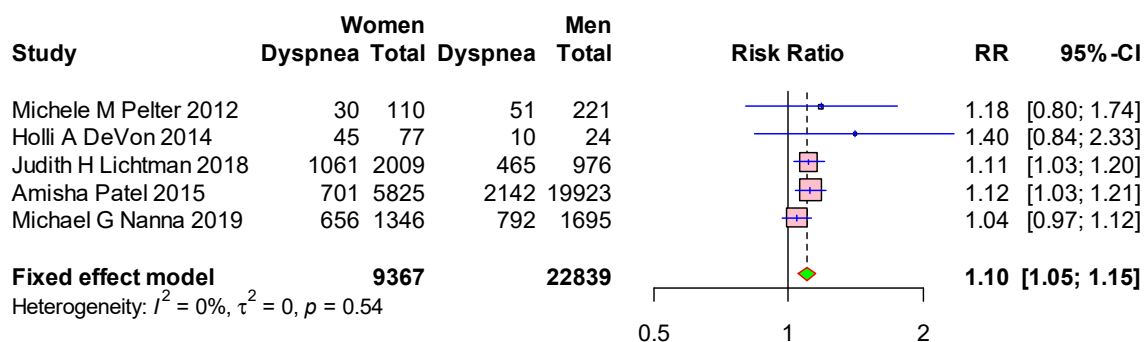

Figure S3 : Dyspnea in ACS confirmed subgroup

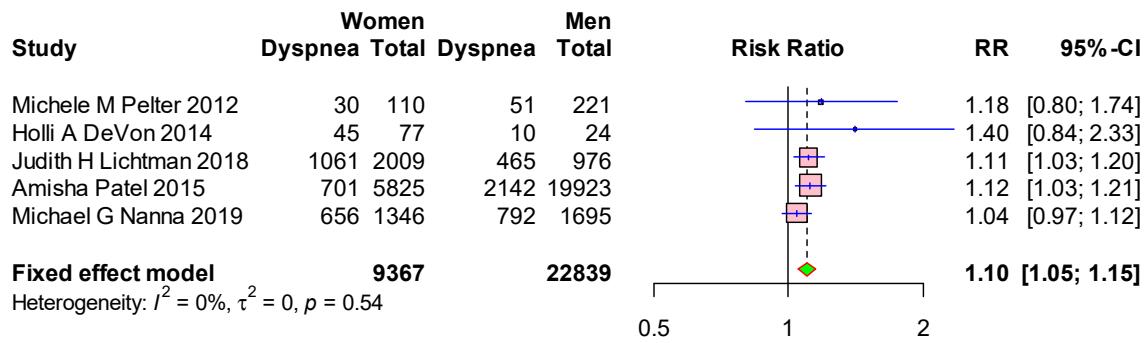

Figure S4 : Dyspnea in ACS confirmed subgroup

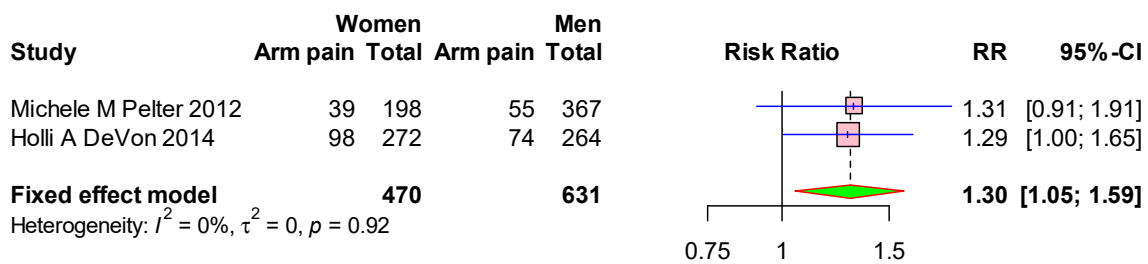

Figure S5 : arm pain

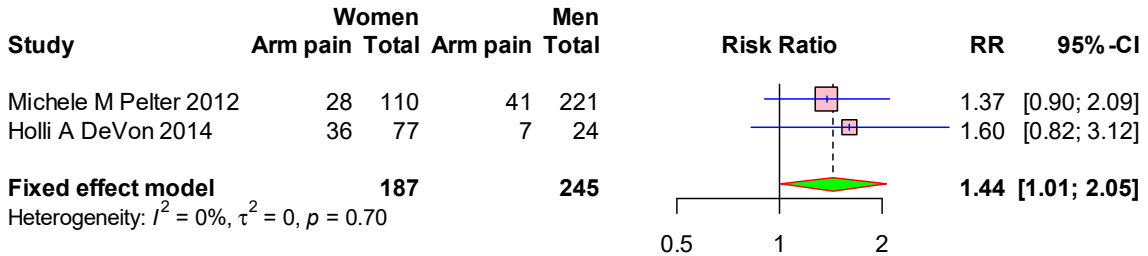

Figure S6 : Arm pain in the ACS confirmed subgroup

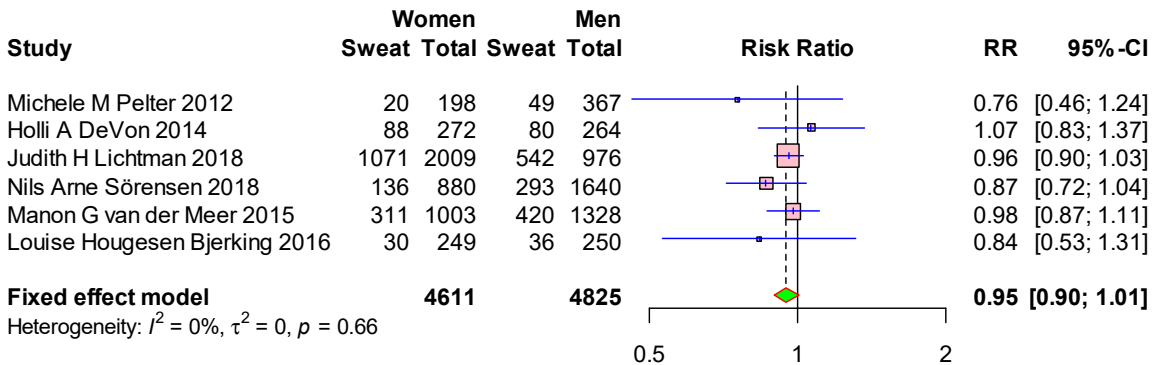

Figure S7 : Clamy skin

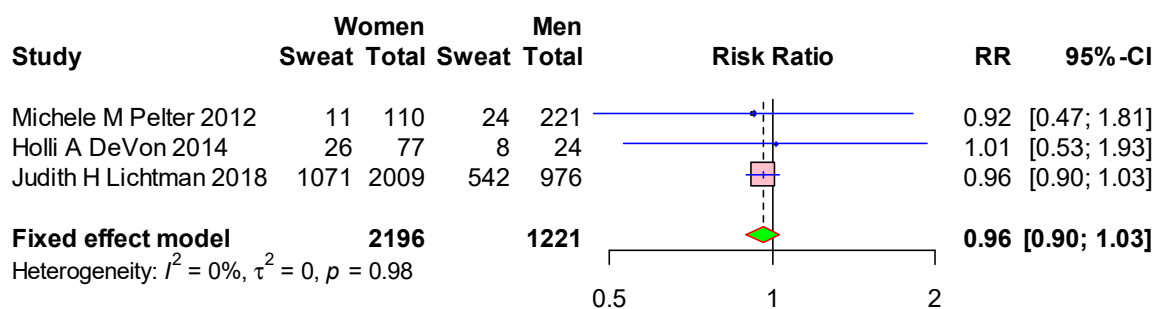

Figure S8 : Clamy skin in the ACS confirmed subgroup

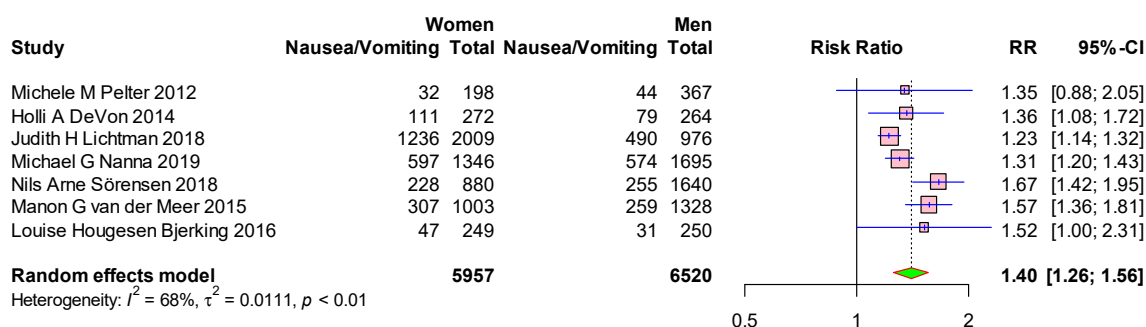

Figure S9 : nausea and vomiting

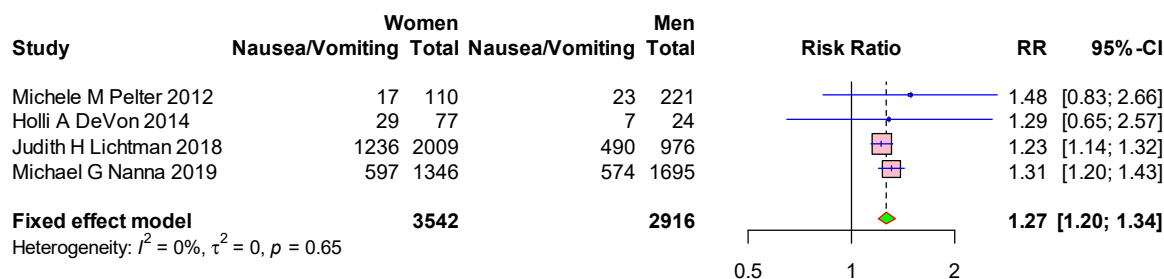

Figure S10 : Nausea-vomiting in the ACS confirmed subgroup

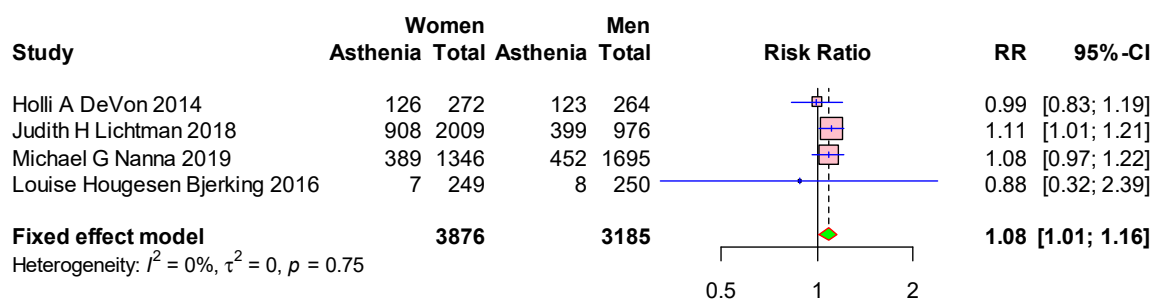

Figure S11 : weakness

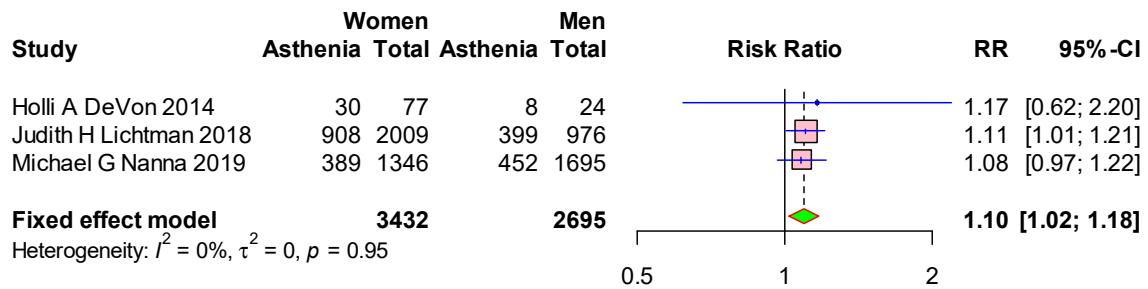

Figure S12 : weakness in the ACS confirmed subgroup

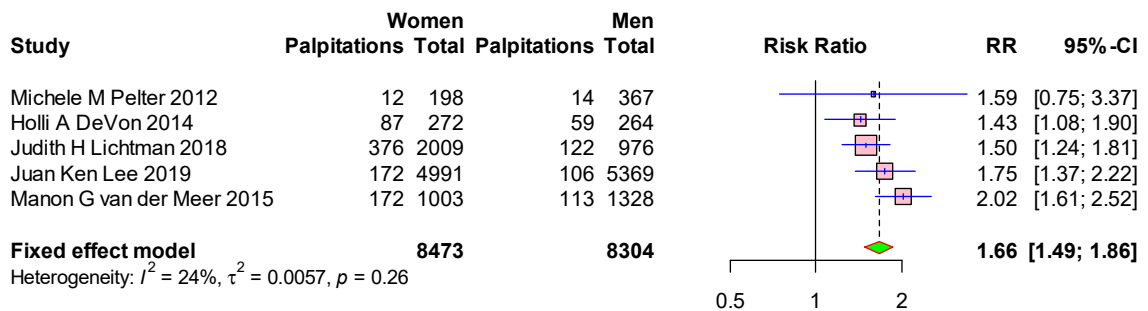

Figure S13 : palpitations

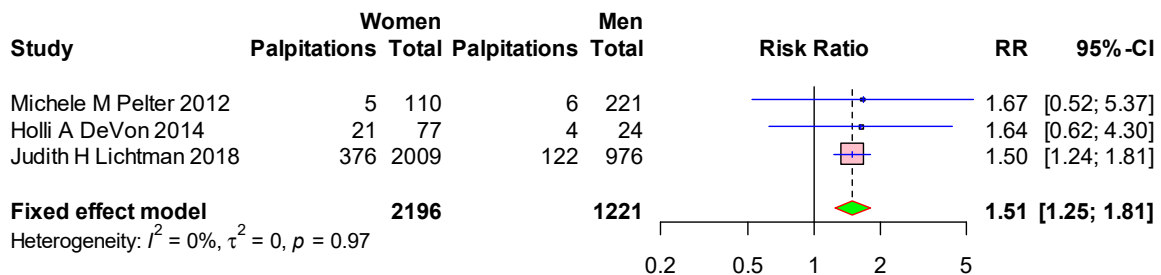

Figure S14 : palpitations in the ACS confirmed subgroup

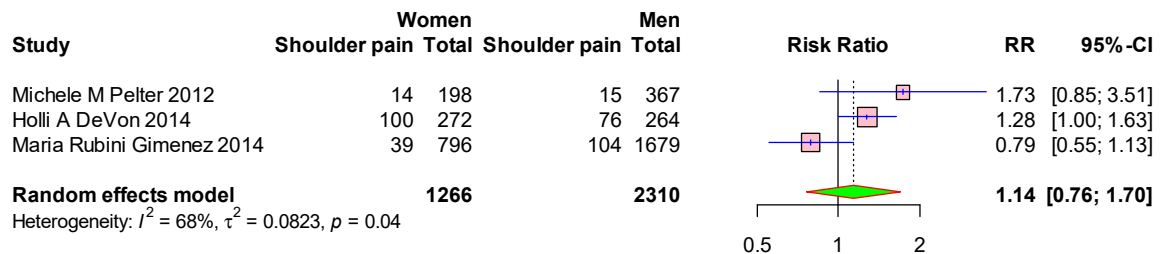

Figure S15 : shoulder pain

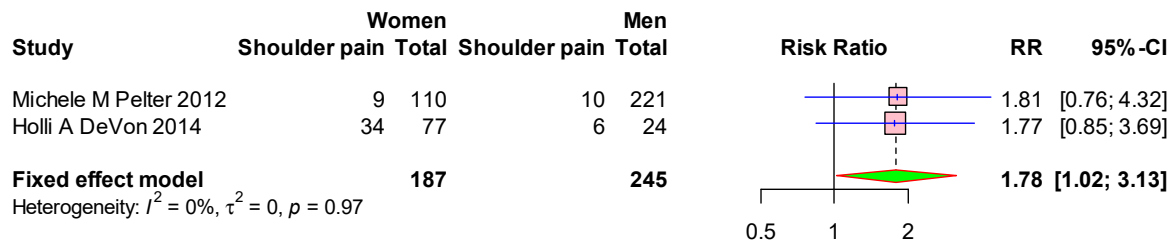

Figure S16 : Shoulder pain in the ACS confirmed subgroup

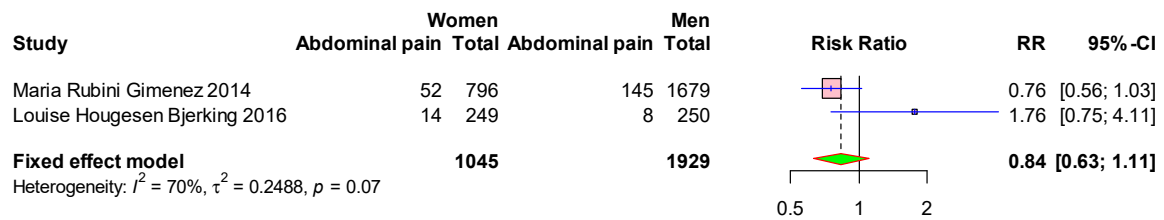

Figure S17 : Upper abdominal pain

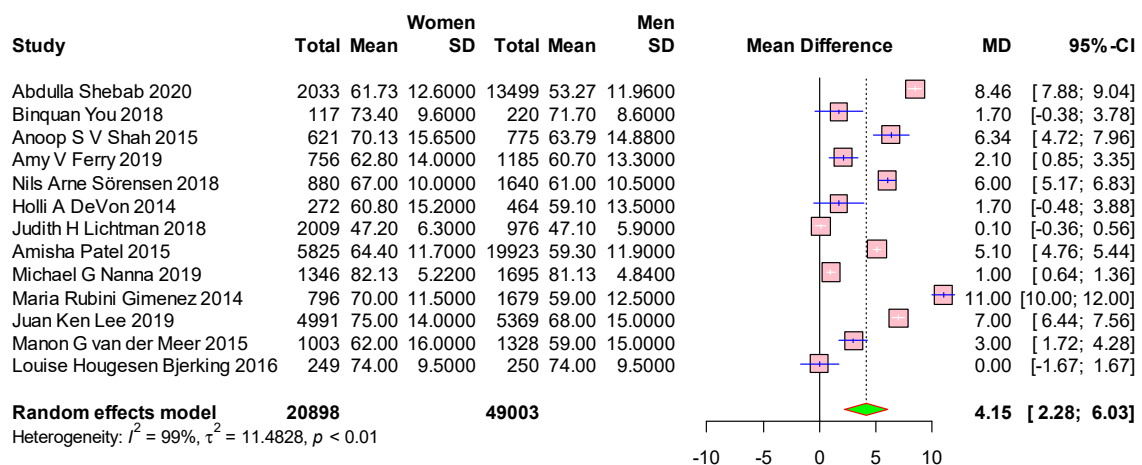

Figure S18 : age at inclusion
